# Supplementary material for: Transient SNAIL1 Expression Is Necessary for Metastatic Competence in Breast Cancer
Source: Oxford University Press journal article supplement (doi:10.1158/0008-5472.can-14-0923), 2014-08-28
Supplement: 00085472can140923-sup-129178_2_supp_2610668_nc9m9c.docx [file 00085472can140923-sup-129178_2_supp_2610668_nc9m9c.docx]

| **Table S1. Spatiotemporal expression of SNAIL1 in MMTV-PyMT mice** | | | |
| --- | --- | --- | --- |
| Tumor Site | Total number of tumors, DTCs, & lung metastases examined from 3 animals | Number of SNAIL1-positive tumor, DTCs & lung metastases | Percent SNAIL1 positive |
| Primary Tumors | 15 | 13 | 87% |
| BM DTCs | 100 | 4 | 4.0% |
| Lung metastases | 100 | 3 | 3.0% |

A table of SNAIL1-positive fraction in indicated tissue types is shown. Three 10-m sections each of primary tumor and lungs with metastases and BM DTC spreads from 5 animals were subjected to IHC for SNAIL1, E-cadherin and Vimentin (primary tumor and lung) or co-IF for panCK and SNAIL1 (BM DTCs) and the SNAIL1-positive percentage in each tissue type shown. Related to Figure S4.
